# Supplementary material for: The Antiparallel Coiled-Coil Domain Allows Multiple Forward Step Sizes of Myosin X
Source: PubMed Central journal article supplement — J Phys Chem Lett. 2023 May 18;14(21):4914–22. doi: 10.1021/acs.jpclett.3c00512 (PMC10240527; doi:10.1021/acs.jpclett.3c00512), 2023-05-18
Supplement: jz3c00512_si_001.pdf [file jz3c00512_si_001.pdf]

## Supporting Information

# **The Antiparallel Coiled-coil Domain Allows the Multiple Forward Step Sizes of Myosin X**

Quang Quan Nguyen<sup>1</sup>, Yangbo Zhou<sup>2, #</sup>, Man Sze Cheng<sup>1, #</sup>, Xianan Qin<sup>1, †</sup>, Harry Chun  
Man Cheng<sup>2</sup>, Xiaoyan Liu<sup>3</sup>, H. Lee Sweeney<sup>3, \*</sup> and HYOKEUN PARK<sup>1, 2, 4, \*</sup>

<sup>1</sup>Department of Physics, The Hong Kong University of Science and Technology, Clear  
Water Bay, Kowloon, 999077, Hong Kong

<sup>2</sup>Division of Life Science, The Hong Kong University of Science and Technology, Clear  
Water Bay, Kowloon, 999077, Hong Kong

<sup>3</sup>Department of Pharmacology and Therapeutics and the Myology Institute, University  
of Florida College of Medicine, Gainesville, FL, 32610-0267, USA

<sup>4</sup>State Key Laboratory of Molecular Neuroscience, The Hong Kong University of  
Science and Technology, Clear Water Bay, Kowloon, 999077, Hong Kong

<sup>#</sup>Two authors contributed equally to this work.

<sup>†</sup>Present Address: School of Material Science and Engineering, Zhejiang Sci-Tech  
University, Hangzhou 310018, China

**\*Corresponding Author**

H. Lee Sweeney, PhD

Department of Pharmacology and Therapeutics and the Myology Institute,

University of Florida College of Medicine,

PO Box 100267, Gainesville, Florida 32610-0267, USA.

E-mail: [Lsweeney@ufl.edu](mailto:Lsweeney@ufl.edu)

**or**

Hyokeun Park, PhD

Department of Physics and Division of Life Science

Hong Kong University of Science and Technology

Clear Water Bay, Kowloon, 999077, Hong Kong

E-mail: [hkpark@ust.hk](mailto:hkpark@ust.hk)

## **1. Materials and methods**

### **Constructs and purification**

Full-length myosin X (amino acids 1-2058) was created starting from the amino acids DNFFTEGTRV and ending at the amino acids RSASSQGSSR. Full-length myosin X was constructed with a FLAG-tag (peptide sequence: DYKDDDDK) at the N-terminus to purify myosin X using an anti-FLAG antibody affinity column. mApple (a red fluorescence protein) and a spacer of three amino-acids were added to the FLAG-tag. mApple that has an excitation peak of 568 nm and an emission peak of 592 nm was used to track the motility of single myosin X molecules.

Chimera with the antiparallel coiled-coil domain consisted of the motor domain and the first IQ motif from myosin V (amino acids 1-790 of myosin V, starting from the amino acids AASELYTKFA and ending at the amino acids LRKKYLRRMK) followed by the second and third IQ motif and the rest of myosin X HMM (173 amino acids, starting from the amino acids LYCVVIIQKN and ending at the amino acids RLEEEACRAA - the end of myosin X HMM).

Chimera with the parallel coiled-coil domain was constructed from the motor domain, 3 IQ motifs and the single alpha helical (SAH) domain from myosin X (amino acids 1-881 of myosin X, starting from amino acids DNFFTEGTRV and ending at the amino acids AELTRELEKQ) and the coiled-coil domain of myosin V (119 amino acids, starting from KIEARVERY and ending at QETEQLVSNL). The coiled-coil domain of myosin V was followed by a leucine zipper (KQLEDKVEELLSKNYHLENEVARLKKLVGE) to allow the chimera to form a dimer.

Mutant myosin X was constructed from amino acids 1-938 of myosin X (starting from the amino acids DNFFTEGTRV and ending at the amino acids RLEEEACRAA). This construct contained 4 mutation points including I890A, L893Q, I897A, K904A in the

antiparallel coiled-coil domain. The antiparallel coiled-coil domain was followed by a linker (SEGGSGGSGGSGGSAASAA) with a leucine zipper and an Avi-tag (peptide sequence: GLNDIFEAQKIEWHE).

The chimeras and mutant myosin X contained mApple and a spacer of 3 amino-acids in the N-terminus, and a FLAG-tag in the C-terminus. All the proteins were expressed in baculovirus expression system and were purified from SF9 cells.<sup>1</sup> Since all the constructs contained a FLAG-tag, these proteins were purified using anti-FLAG antibody affinity columns.

### **Actin filaments and actin bundles**

Globular actins (G-actins) were obtained from the rabbit skeletal muscle as previously described.<sup>2</sup> Fascin expressed in *E. Coli* was purified as described in the previous report.<sup>3</sup> Actin filaments and actin bundles were prepared as described in the previous report.<sup>4</sup> Actin filaments were polymerized in the polymerization buffer containing 10  $\mu$ M G-actin, 100  $\mu$ M MgATP and 5  $\mu$ M phalloidin. F-actin was incubated at 4°C for 12 hours before use. In order to prepare actin bundles, 8  $\mu$ M F-actin was mixed with 3  $\mu$ M fascin in buffer and incubated on ice and stored at 4°C for two days before performing experiments.

### **Single-molecule motility assays**

Sample chambers used in experiments were prepared as described in the previous report.<sup>5</sup> Firstly, we sonicated the microscope slides and coverslips using Milli-Q water for 30 minutes and rinsed with milliQ water 3 times. Next, we sonicated the microscope slides and coverslips with acetone for 30 minutes and rinsed with Milli-Q water 3 times. After that, we sonicated the microscope slides and coverslips with 1 M KOH for 30 minutes and rinsed with

Milli-Q water 3 times. Then, we sonicated the microscope slides and coverslips with Milli-Q water for 30 minutes and rinsed with Milli-Q water 3 times. After finishing the sonication, we dried the microscope slides and coverslips, coated the coverslips using 15  $\mu$ L nitrocellulose, and incubated it for 1 hour to let the coverslips dry. Finally, we assembled the chamber with coated coverslips and a microscope slide using double-sided tape and sealed with epoxy glue. Sample chambers were stored in a dehumidifier.

Motility buffer for single-molecule motility assay contained 20 mM HEPES, 2 mM  $MgCl_2$ , 25 mM KCl, 1 mM EGTA, 10 mM DTT and 5.5  $\mu$ M Calmodulin. N-ethylmaleimide-modified myosin (NEM myosin) was diluted in motility buffer to reach the final concentration of 0.25 mg/mL and then was loaded into the sample chamber for actin immobilization. After 7-minute incubation at room temperature and washing, actin filaments or actin bundles were introduced into the sample chamber. After another 7-minute incubation, unbound filaments or actin bundles were gently washed out with buffer, and myosin was added into the chamber. The concentration of myosin varied for each construct. To block the non-specific binding, myosin was diluted in buffer with casein (7.6 mg/mL). After incubation to let myosin bind to actin filaments or actin bundle, we observed the fluorescence signals of myosin using a fluorescence microscope to choose the regions where actin filaments or actin bundle were stable and performed fluorescent imaging experiments in those regions. Actin filaments or actin bundles could be observed by illuminating mApple-fused motor domains of myosin with a 561 nm laser. Finally, ATP was added into the sample chamber to observe the motility of myosin. In order to measure step sizes, 2  $\mu$ M ATP was used. 2 mM ATP was used to measure run-length and velocity of myosin.

### **Total internal reflection fluorescence microscope**

To acquire fluorescence signals, an inverted microscope (IX73, Olympus) with a 100X objective with a numerical aperture (NA) of 1.49 (UAPON, Olympus) was used. mApple-fused myosin was excited by a 561 nm laser (Coherent Inc.). The laser beam was expanded through a 15X beam expander (Edmond Optics) and was focused on the back focal plane of the objective through a lens. The lens was used to adjust the incident angle to achieve a critical angle for total internal reflection. Fluorescence signals were acquired with an EMCCD camera (Ixon Ultra, Andor) with an exposure time of 100 msec or 150 msec via a frame-transfer mode through a dichroic mirror (ZET488/561rpc, Chroma) and an emission filter (ZET488/561m, Chroma) in a microscope. An additional emission filter (ET595/50m, Chroma) was used in front of a camera.

## Data analysis

The localization of single mApple-fused myosin was made by fitting the point spread function (PSF) into a two-dimensional Gaussian using the following equation<sup>6</sup>

$$I(x, y) = A_0 + A_1 \exp \left[ -\frac{1}{2} \left( \frac{x - x_0}{\sigma_x} \right)^2 - \frac{1}{2} \left( \frac{y - y_0}{\sigma_y} \right)^2 \right]$$

with  $A_0$  is the background,  $A_1$  is the peak intensity of the PSF,  $x_0$  and  $y_0$  are the centroids in the x and y direction,  $\sigma_x$  and  $\sigma_y$  are the corresponding standard deviations in the x and y direction.

Custom-made IDL programs were used to localize the centroids of mApple-fuse motor domains of myosin. The trajectories were generated by plotting the centroids of PSFs in every imaging frame. The steps in trajectories were detected using a MATLAB program that was created in Ahmet Yildiz's lab at the University of California, Berkeley. Using the

function `normalMixEM` of the `mixtool` package in R language and cross-validation technique, the histograms of step sizes were fitted with mixture of multiple-peak Gaussian functions.<sup>7</sup>

## 2. Supporting Figure

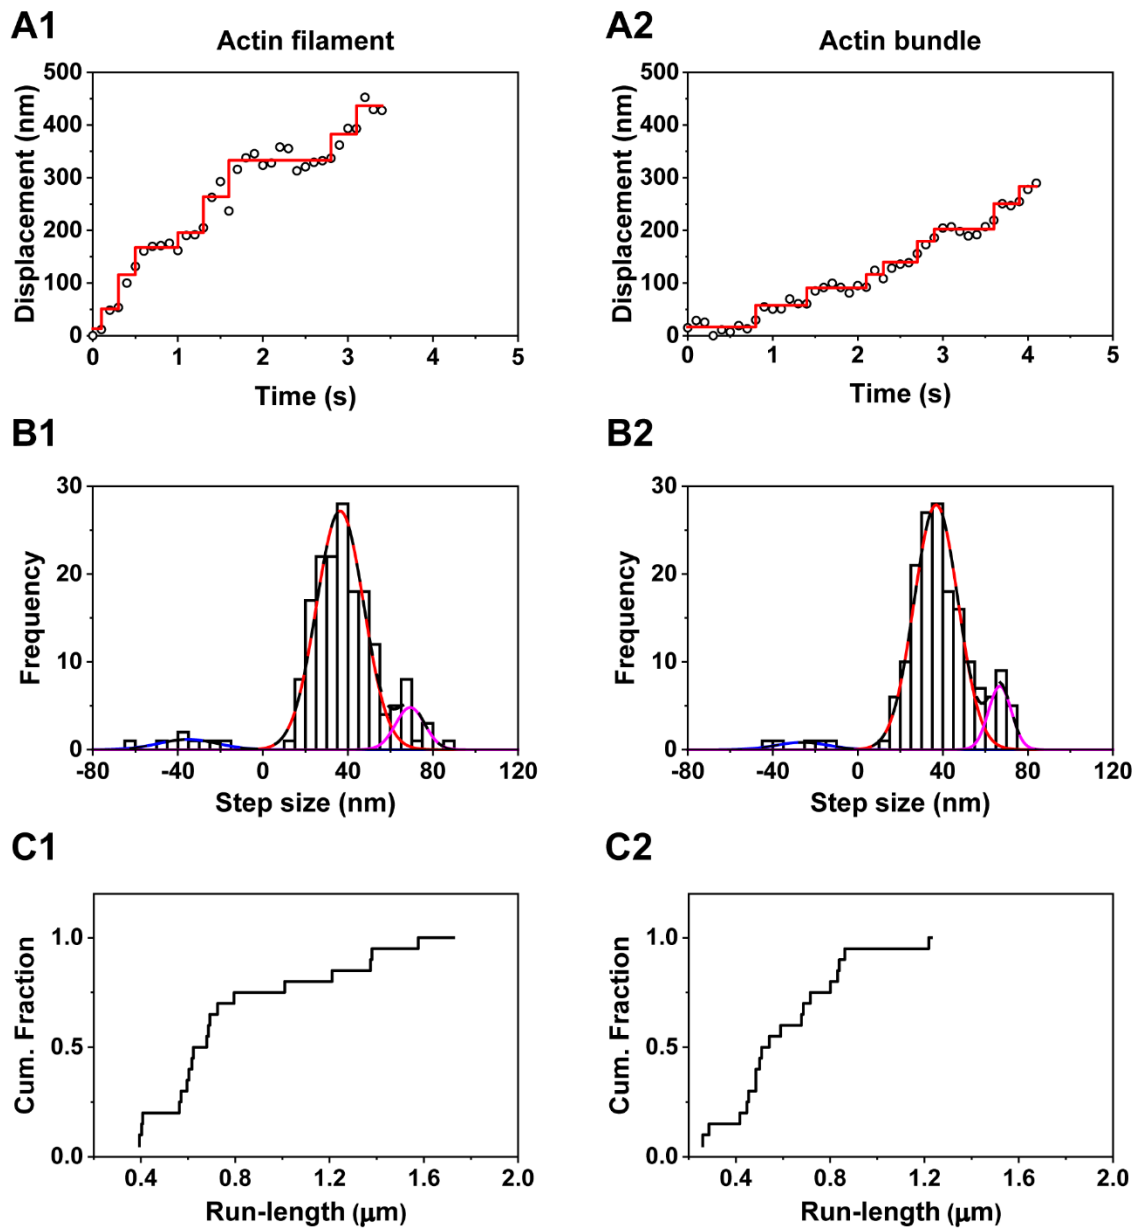

Figure S1. The motility of myosin V. (A) Representative traces of myosin V moving on actin filaments (A1) and actin bundles (A2). (B) Step size histograms of myosin V moving on actin filaments (B1) and actin bundles (B2) at 2  $\mu\text{M}$  ATP. The step size histogram of myosin V moving on actin filaments was fitted with the sum of 3 Gaussian components centred at  $-35.3 \pm 13.7$  ( $\pm$  standard deviation (SD)) nm,  $36.3 \pm 11.1$  nm,  $69.3 \pm 6.8$  nm. ( $n = 176$  steps). The step size histogram of myosin V moving on actin bundles was fitted with the sum of 3 Gaussian components centred at  $-26.2 \pm 12.1$  nm,  $36.9 \pm 10.3$  nm,  $66.9 \pm 5.4$  nm. ( $n = 169$  steps). (C) Run-length of myosin V on actin filaments (C1) and actin bundle (C2) at 2 mM ATP. Average run-length of myosin V on actin filaments was  $0.83 \pm 0.40$  ( $\pm$  SD)  $\mu\text{m}$  ( $N = 20$  molecules). Average run-length of myosin V on actin bundles was  $0.64 \pm 0.26$   $\mu\text{m}$  ( $N = 20$ ).



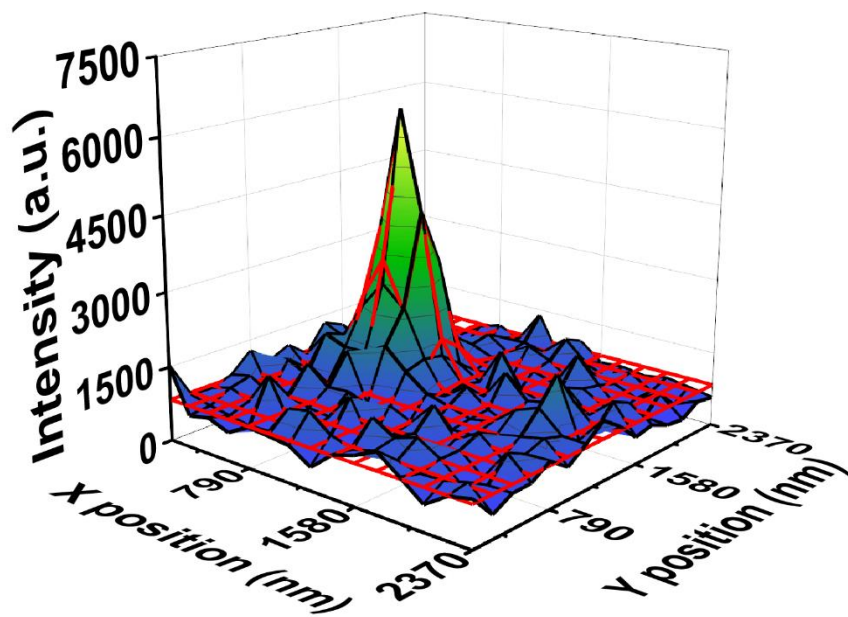

Figure S2. Point spread function. The red mesh is the 2D Gaussian fitting of the point spread function (PSF). Using the obtained centroid from 2D Gaussian fitting, we localized the centroids of single mApple molecules.

## References

- (1) Ropars, V.; Yang, Z.; Isabet, T.; Blanc, F.; Zhou, K.; Lin, T.; Liu, X.; Hissier, P.; Samazan, F.; Amigues, B.; Yang, E. D.; Park, H.; Pylypenko, O.; Cecchini, M.; Sindelar, C. V.; Sweeney, H. L.; Houdusse, A., The myosin X motor is optimized for movement on actin bundles. *Nat. Commun.* **2016**, *7*, 12456.
- (2) De La Cruz, E. M.; Wells, A. L.; Rosenfeld, S. S.; Ostap, E. M.; Sweeney, H. L., The kinetic mechanism of myosin V. *Proc. Natl. Acad. Sci. U.S.A.* **1999**, *96* (24), 13726-13731.
- (3) Ono, S.; Yamakita, Y.; Yamashiro, S.; Matsudaira, P. T.; Gnarr, J. R.; Obinata, T.; Matsumura, F., Identification of an actin binding region and a protein kinase C phosphorylation site on human fascin. *J. Biol. Chem.* **1997**, *272* (4), 2527-2533.
- (4) Sun, Y.; Sato, O.; Ruhnnow, F.; Arsenault, M. E.; Ikebe, M.; Goldman, Y. E., Single-molecule stepping and structural dynamics of myosin X. *Nat. Struct. Mol. Biol.* **2010**, *17* (4), 485-491.
- (5) Park, H.; Hanson, G. T.; Duff, S. R.; Selvin, P. R., Nanometre localization of single ReAsH molecules. *J. Microsc.* **2004**, *216* (Pt 3), 199-205.
- (6) Park, H.; Toprak, E.; Selvin, P. R., Single-molecule fluorescence to study molecular motors. *Q. Rev. Biophys.* **2007**, *40* (1), 87-111.
- (7) Benaglia, T.; Chauveau, D.; Hunter, D. R.; Young, D. S., mixtools: An R Package for Analyzing Mixture Models. *J. Stat. Softw.* **2009**, *32*(06), 1-29.
